# Supplementary material for: Deep Learning in Clinical Diagnostics: A Scoping Review of Innovations Shaping Future Healthcare Delivery
Source: Research Square preprint supplement (doi:10.21203/rs.3.rs-7876598/v1), 2025-11-18
Supplement: Supplementary file 1 [file 76900c9c210233bb8ef9b3fe.xlsx]

## Sheet: table1_full_24studies.csv
Author(s) Year	DOI	Country	Clinical Domain	Diagnostic Task / Modality	Sample Size (N) / Dataset Source	Deep Learning Model Type	Comparator	Outcome Metrics	Validation Approach	Implementation Setting	Key Findings	Reported Challenges
Zheng T, Lin F, Li X, et al., 2023	https://www.thelancet.com/journals/eclinm/article/PIIS2589-5370(23)00090-1/fulltext	China	Radiology / Breast Imaging	Segmentation & classification of single-mass breast lesions using contrast-enhanced mammography (CEM)	1,912 women (CEM before biopsy/surgery, 2017–2022)	Fully Automated Pipeline System (FAPS): RefineNet + Xception + Pyramid Pooling Module	Six radiologists (with/without FAPS assistance)	DSC 0.888 (internal); 0.820 (external); 0.837 (prospective); AUC 0.947/0.940/0.891; sensitivity, specificity; reading time (6s vs ~3min)	Training/validation; internal test; pooled external test; prospective test	Multicenter hospital imaging (China)	High DSC & AUC; faster classification; improved radiologist performance; BI-RADS reclassification in ~12–13%	Generalisability limited to Chinese cohorts; focused on single-mass lesions; external validation beyond China needed
Ng A.Y., et al., 2023	https://www.nature.com/articles/s41591-023-02625-9	Hungary	Radiology / Breast Imaging	Mammography screening — AI as additional reader	3,746 (pilot) + 9,112 (extended) + 15,953 (live rollout) women screened	Ensemble of CNNs (commercial AI system, “Mia”)	Standard double reading by radiologists	Cancer detection rate increase (0.7–1.6/1,000); recall rate increase (0.16–0.30%); PPV increase (0.1–1.9%); additional workload (4–6%)	Prospective, phased evaluation (pilot → extended → live rollout)	MaMMa Klinika, Hungary (real-world screening program, 4 sites)	AI addition improved early cancer detection (mostly small/invasive tumors), minimal recall increase; feasible and safe in rollout	Single-institution study, short follow-up, tested only one AI system; generalisability uncertain
Glissen Brown., et al., 2022	https://www.sciencedirect.com/science/article/pii/S1542356521009733	United States	Gastroenterology / Colonoscopy	Real-time polyp detection during colonoscopy using deep-learning CADe (EndoScreener)	223 patients (232 randomized, 9 excluded) across 4 U.S. academic centers	SegNet-based deep neural network (EndoScreener)	High-definition white-light (HDWL) colonoscopy (tandem design)	Adenoma miss rate 20.12% vs 31.25% (P=0.0247); Polyp miss rate 20.7% vs 33.7%; SSL miss rate 7.14% vs 42.11% (P=0.0482); APC 1.19 vs 0.90 (P=0.0323)	Prospective, multicenter randomized tandem colonoscopy RCT (single-blind)	4 academic endoscopy centers in U.S.	DL-CADe significantly reduced adenoma and SSL miss rates; increased adenomas per colonoscopy	Additional withdrawal time; small sample size; generalizability beyond academic centers needs further study
Lagström RMB et al., 2025	https://pmc.ncbi.nlm.nih.gov/articles/PMC11866038/	Denmark	Gastroenterology / Colonoscopy	Real-time polyp detection during colonoscopy via AI-assisted GI Genius system	795 patients (400 AI-assisted; 395 control)	DL CADe/CADx (GI Genius v3)	Conventional (non-AI) colonoscopy	ADR 59.1% vs 46.6% (p<0.001); PDR ↑; APC ↑; NNRR reported	Prospective multicenter quasi-randomized crossover trial	Four Danish regional endoscopy centers (real-world rollout)	AI significantly improved ADR and PDR without prolonging procedures; strongest effect in expert endoscopists	Quasi-randomized design, subgroup analyses underpowered, generalizability beyond Nordic setting limited
Marchetti M.A., et al., 2023	https://www.nature.com/articles/s41746-023-00872-1	USA	Dermatology / Melanoma Detection	Dermoscopy-based melanoma diagnosis using open-source AI (ADAE)	435 patients, 603 biopsied lesions (95 melanomas)	ADAE (open-source convolutional neural network trained on dermoscopy images)	Dermatologist evaluation before vs after ADAE assistance	Sensitivity 96.8%; Specificity 37.4%; AUC improved 0.7798 → 0.8161 (p=0.042); net clinical benefit higher than 'biopsy all' approach	Prospective observational validation study with real-time ADAE use during clinical assessment	Dermatology clinics in New York & New Jersey, USA	ADAE achieved high sensitivity; dermatologist accuracy improved with AI assistance; feasible for integration into clinical workflows	Low specificity, predominantly White study population, limited generalizability; larger randomized trials needed
Mahmud M.A.A., 2025	https://www.nature.com/articles/s41598-025-09938-4	Bangladesh	Dermatology / Melanoma Detection	Early-stage melanoma detection from dermoscopic images using explainable deep learning	Dataset1 ≈13,900 images; Dataset2 ≈10,000 images (public dermoscopy datasets)	Xception-based DL model with Grad-CAM saliency XAI components	ResNet50, EfficientNetV2, MobileNetV2 (benchmark models)	Dataset1 — Accuracy 91.09%, AUC 92.11%, Recall 91.79%, Precision 94.72%, F1 91.95%; Dataset2 — Accuracy 96.48%, AUC 98.68%, Recall 96.37%, Precision 96.83%, F1 96.60%	Train/validation/test splits across two independent public datasets	Computational validation on public dermoscopy datasets (no clinical deployment)	Outperformed benchmark architectures; high accuracy and AUC across datasets; XAI visualizations improved interpretability	Limited dataset diversity and skin-tone representation; no real-world clinical validation; computational resource requirements
Dong L., 2022	https://jamanetwork.com/journals/jamanetworkopen/fullarticle/2791807	China	Ophthalmology / Retinal Disease Screening	Screening for multiple retinal and optic nerve diseases using fundus photographs (RAIDS)	Development: 120,002 fundus images; Prospective validation: 208,758 images from 110,784 individuals	RAIDS — deep convolutional neural network ensemble for multi-disease classification	Retinal specialists (junior/senior) and certified ophthalmologists	Sensitivity for any of 10 retinal diseases 89.8% (95% CI 89.5–90.1); per-disease accuracies 95.3%–99.9%; RAIDS sensitivity for any abnormality 91.7% vs certified ophthalmologists 83.7%	Retrospective development + large prospective, multicenter external validation across 65 screening centers in 19 Chinese provinces	Real-world screening programs and hospitals (65 centers) across China	RAIDS accurately detected 10 retinal/optic nerve diseases with high sensitivity and per-disease accuracy, generalized across centers and outperforming or matching specialists for several conditions; scalable for population screening.	Predominantly Chinese population and screening settings—external validation in other regions needed; limited to fundus-photo–detectable conditions; potential spectrum bias and workflow integration considerations.
Brant A., 2025	https://jamanetwork.com/journals/jamanetworkopen/fullarticle/2831702	India	Ophthalmology / Retinal Disease Screening	Fundus-photo screening for diabetic retinopathy and diabetic macular edema using ARDA (automated retinal disease assessment)	N=4,537 adjudicated images sampled from ≈600,000 screened patients (3,941 gradable) across 45 sites	ARDA — CE-approved deep-learning ensemble (Google/Verily deployment)	Ophthalmologist-adjudicated grading (US ophthalmologists / certified ophthalmologists)	Severe NPDR/PDR sensitivity 97.0% (95% CI 92.6–99.2), specificity 96.4% (95% CI 95.7–97.0); STDR sensitivity 95.9%, specificity 94.9%; PPV 50.7%, NPV 99.9%; clinically important miss rate 0% for severe NPDR/PDR.	Post-deployment cross-sectional adjudication study (random sample Jan 2019–Jul 2023) with multicenter real-world data (45 sites)	Vision centers, diabetes clinics, and tertiary hospitals across Tamil Nadu (Aravind Eye Hospitals program)	ARDA maintained very high sensitivity/specificity for severe DR and STDR in large postdeployment screening; referred all severe cases in the sample.	Predominantly Indian cohort; ungradability rates; potential spectrum/selection bias; COI (several authors affiliated with Google); external validation in other regions needed.
Sharma V., Nillmani, Gupta S.K., et al., 2024	https://mednexus.org/doi/10.1016/j.imed.2023.06.001	India	Pulmonology / Radiology	Tuberculosis detection and infected-region visualization on chest X-rays (CXR)	Multiple public CXR datasets — UNet trained on ~704 CXRs; classification evaluated on ~1,400+ TB/control images (total ≈2k)	Segmentation (UNet) + classification (Xception-based classifier); Grad-CAM heatmap visualization	Benchmark DL architectures / prior methods (VGG, ResNet, DenseNet, other transfer-learning models).	Segmentation (UNet): Accuracy 96.35%, Jaccard index 90.38%, Dice coefficient 94.88%, AUC 0.99; Classification (Xception): Accuracy 99.29%, Precision 99.30%, Recall 99.29%, F1-score 99.29%, AUC 0.999	Retrospective train/validation/test splits on independent public datasets	Computational experiments on public CXR repositories (no clinical deployment)	Pipeline combining UNet segmentation + Xception classifier + Grad-CAM achieved very high accuracy and localized TB lesions (mainly upper lung zones), outperforming benchmark DL models.	Dataset heterogeneity, reliance on public datasets, lack of prospective/clinical validation, and need for more diverse training cohorts.
Munjal P., et al., 2025	https://pmc.ncbi.nlm.nih.gov/articles/PMC12241593/	United Arab Emirates	Pulmonology / Radiology	Tuberculosis screening on chest X-rays (CXR) using AI-powered AIRIS-TB as primary reporter	~1.04 million CXRs from January 2022 to January 2024; plus three external datasets (CheXpert 500 scans, ChestIU 3,785 scans, PadChest 23,934 scans)	EfficientNet-V2-S classification model (multiclass), integrated with Grad-CAM explainability	Radiologist performance (FNR 1.85%)	AUC 98.51%; overall FNR 1.57% (optimal setting); safe-setting FNR 0.33% (0% TB-FNR); workload reduction (WLR) up to 80% automated reporting; AUROC 96.3–99.4% across subgroups	Quasi-prospective cross-sectional observational analysis on ~1M CXRs; zero-shot external validation on 3 public datasets; per-case radiologist review of false negatives	Real-world high-throughput TB screening at Capital Health Screening Centre (UAE)	AIRIS-TB achieved high diagnostic safety and AUC; could automate up to 80% of routine chest X-ray reporting without compromising safety; performance robust across demographics and external datasets	Retrospective elements; limited to low-prevalence screening setting; prospective clinical trials needed; operational threshold tuning required; generalisability issues in triage-high-prevalence workflows
Holste G et al., 2025	https://www.sciencedirect.com/science/article/pii/S2772963X25004296	USA	Cardiology / Echocardiography	Full interpretation of transthoracic echocardiograms (TTE) via multi-task deep learning AI ('PanEcho')	~1.2 million echo videos from 32,265 TTEs (24,405 patients); internal validation — distinct temporal cohort; external validation — 4 diverse cohorts	Multi-task, view-agnostic deep learning model (image encoder + temporal transformer + task-specific heads)	Interpretations by clinicians (cardiologists) on standard echocardiography metrics	Classification tasks (18): median AUC 0.91 (IQR 0.88–0.93); Estimation tasks (21): median normalized MAE 0.13; LVEF MAE 4.2% internal, 4.5% external; severe AS AUC 0.98–1.00	Retrospective development, internal temporal validation, multi-center external validation	Multi-site echo labs in Yale system; tested in limited imaging (ED) settings	PanEcho accurately automated full TTE interpretation across diagnostic labels and quantitative metrics, matching or exceeding expert-level performance	Retrospective design only; no prospective clinical outcome data; interpretability limited; computational resource needs and workflow integration challenges noted
Mujeeb et al., 2024	https://www.sciencedirect.com/science/article/pii/S2666521224000632	United Arab Emirates	Pulmonology / Radiology	Detection & classification of PTB on chest X-rays (CXR)	12,848 CXR images from five open-access datasets (Shenzhen, Montgomery, Tuberculosis CXR, public CXR sets, TBX11K)	Custom lightweight CNNs (binary + multi-class)	Pretrained CNNs (Xception, ResNet, etc.)	Binary: Acc 99.72%, Sens 100%, Spec 99.72%; Multi-class: Acc 99.61%	70/10/20 split + 5-fold CV	Google Colab, Gradio interface for prototype deployment	Lightweight CNN outperformed larger models with high accuracy, feasible for low-resource settings	Class imbalance, limited explainability, need for GAN/Transformer augmentation
Dembrower K., Crippa A., Colón E., Eklund M., Strand F., et al., 2025	https://www.thelancet.com/journals/landig/article/PIIS2589-7500(23)00153-X/fulltext	Sweden	Radiology / Breast Imaging	Screening mammography — AI as independent reader in population-based screening	55,581 women screened (out of 58,344 eligible) from April 2021 to June 2022	Commercial AI system (ScreenTrustCAD) used as standalone AI reader and for replacement of one radiologist	Standard double reading by two radiologists	Cancer detection count: 261 (AI + one radiologist) vs 250 (two radiologists); RP 1.04 (95% CI 1.00–1.09); single AI reading non-inferior	Prospective, population-based, paired-reader, non-inferiority study	Capio Sankt Göran regional screening program (Stockholm)	Replacing one radiologist with AI maintained non-inferior cancer detection; triple-reading increased detection	Single-center setting; not tested across diverse systems/populations; requires controlled risk management when scaling
Eisemann N., et al., 2025	https://www.nature.com/articles/s41591-024-03408-6	Germany	Radiology / Breast Imaging	Mammography screening — AI-supported double reading vs standard double reading	463,094 women screened across 12 sites; 260,739 in AI-supported group, 201,079 control	Commercial AI decision-support system ('Vara' tool with safety net alerts and confidence tagging)	Standard double reading by radiologists (without AI)	Breast cancer detection rate: 6.7 vs 5.7 per 1,000 (+17.6% relative); recall rate slightly lower; PPV recall 17.9% vs 14.9%	Prospective, observational, multi-center, real-world implementation study with overlap-weighted analysis	Population-based organized screening program in Germany (12 sites)	AI-supported double reading increased cancer detection significantly, reduced recall slightly, improved PPV	Voluntary AI usage may introduce selection bias; generalisability to other health systems requires evaluation; long-term outcomes not yet known
Salim M., et al., 2024	https://www.nature.com/articles/s41591-024-03093-5	Sweden	Radiology / Breast Imaging	Mammography + AI triage for supplemental MRI screening	59,354 women screened; 4,103 eligible (top 6.9% AI score); 663 completed MRI	AISmartDensity — ensemble of three CNN modules	Traditional mammographic density-based triage	64.4 cancers detected per 1,000 MRIs (AI) vs 16.5 per 1,000 (density); PPV1 37.9%; PPV3 50.7%	Randomized controlled trial; prospective MRI detection analysis (secondary endpoints)	Population-based screening at Karolinska (Sweden)	AI-selected top 6.9% had 4× more cancers detected per MRI vs density; detected mostly invasive/multifocal cancers	Small MRI subgroup; AI trained only on Hologic images; incomplete follow-up MRI results pending; generalizability limited
Chang Y-W et al., 2025	https://www.nature.com/articles/s41467-025-57469-3	South Korea	Radiology / Breast Imaging	Mammography screening — breast radiologists interpreting screening mammograms with vs without AI-CAD in single-read setting	24,543 women (24,545 mammograms), national screening program	Commercial AI-CAD (Lunit INSIGHT MMG v1.1.7.1)	Radiologist performance without AI assistance	CDR: 5.70‰ with AI vs 5.01‰ without (13.8% increase; p<0.001); Recall rate similar; PPV1 12.6% vs 11.2%	Prospective multicenter cohort within national screening program; simulated assessment for general radiologists and standalone AI	Six academic hospital centers integrated into National Breast Cancer Screening Program (South Korea)	AI-CAD improved cancer detection without increasing recall; benefits across specialists and general radiologists	Observational design (non-randomized); 2-year follow-up pending; single AI system and DM only
Park D.K et al., 2024	https://www.nature.com/articles/s41598-024-77079-1	South Korea	Gastroenterology / Colonoscopy	Real-time polyp detection during colonoscopy using RetinaNet-based AI system	805 patients across six institutions; model trained on image folds + video frames	RetinaNet object detection (ResNet50 backbone + FPN)	Conventional colonoscopy without AI assistance	Static image sens mean 96.20%; Video detected 92/94 polyps; PDR 62% vs 52% (p=0.01); ADR 35% vs 28% (p=0.03)	Prospective multicenter randomized controlled trial with concealed allocation	Six tertiary endoscopy centers in South Korea	AI-assisted colonoscopy significantly improved PDR and ADR, esp for small polyps, without increasing withdrawal time	Minor BMI imbalances; patient withdrawal; model trained on local data—generalizability unknown
Latcher et al., 2023	https://www.igiejournal.org/article/S2949-7086(23)00015-8/fulltext	Israel	Gastroenterology / Colonoscopy	Real-time adenoma/polyp detection during white-light colonoscopy (CADe)	674 colonoscopies randomized (AI = 330; control = 344)	DEEP² (DEtection of Elusive Polyps) deep-learning detector (trained on white-light videos)	Standard colonoscopy without AI	ADR 37% vs 27% (+10%, p=0.0057); APC 0.62 vs 0.39 (p<0.001); PDR 55.5% vs 38.7% (p<0.001); ~4 false alerts/exam	Prospective randomized controlled trial (1:1), unblinded	Real-world ambulatory endoscopy unit, Haifa, Israel	AI significantly improved ADR, APC, and PDR—especially in proximal/right colon—without prolonging procedure time	Single-center, unblinded; trained on local white-light data—generalizability uncertain
Winkler J.K. et al., 2023	https://jamanetwork.com/journals/jamadermatology/fullarticle/2804568	Germany	Dermatology / Melanocytic Lesion Classification	Dermoscopy-based classification of melanocytic lesions using CNN assistance	228 lesions (190 nevi, 38 melanomas) from 188 patients assessed by 22 dermatologists	Moleanalyzer Pro (commercial CNN, FotoFinder Systems)	Dermatologists alone vs dermatologists + CNN vs CNN alone	Sensitivity improved 84.2% → 100.0% (p=.03); Specificity 72.1% → 83.7% (p<.001); Accuracy 74.1% → 86.4% (p<.001); ROC AUC 0.895 → 0.968	Prospective diagnostic study with dermatologists reclassifying lesions after CNN scores were provided	Clinical dermatology settings in Germany (Heidelberg and Konstanz)	Dermatologists improved diagnostic metrics with CNN assistance; CNN alone comparable or better than unaided dermatologists	Limited sample size; higher benefit in less experienced dermatologists; generalizability beyond settings uncertain
Paisan Ruamviboonsuk, et al., 2022	https://www.thelancet.com/journals/landig/article/PIIS2589-7500(22)00017-6/fulltext	Thailand	Ophthalmology / Retinopathy Screening	Real-time screening for vision-threatening diabetic retinopathy using fundus photography	7,651 patients (from 7,940 screened) across 9 primary-care sites	Deep-learning system (unspecified architecture) providing real-time interpretations & referral recommendations	Adjudicated reference standard by fellowship-trained retina specialists (over-readers)	Accuracy 94.7% (95% CI 93.0–96.2); Sensitivity 91.4% (87.1–95.0); Specificity 95.4% (94.1–96.7); PPV 79.2%; NPV 95.5%	Prospective interventional cohort study deploying DL system in real-world primary care settings	Nine primary-care screening sites under Thailand's national program	DL system achieved accuracy and sensitivity comparable to retina specialists; feasible for large-scale DR screening in LMICs	Integration into workflows and socioenvironmental factors in LMIC settings must be considered
Yifan Peng, et al., 2024	https://www.nature.com/articles/s41591-023-02702-z	China	Ophthalmology / Diabetic Retinopathy Prognostics	Predicting time-to-progression of diabetic retinopathy using retinal fundus photography (with/without metadata)	Pretraining on 717,308 fundus images from 179,327 individuals; training/validation on 118,868 images from 29,868 participants; external validation across eight longitudinal cohorts	DeepDR Plus (fundus-only survival model; deep learning–based prognostic system)	Metadata-based Cox survival model and combined (fundus+metadata) model; benchmarked against ophthalmologist-graded progression outcomes	Internal C-index (0–5 yrs) 0.754–0.846; External 1–5 yr C-index 0.823–0.862; Real-world: extended avg screening interval ~12→~32 months with ≤0.18% delayed detection of VTDR	Internal validation (cross-cohort) + external validation on 8 independent datasets + prospective real-world evaluation	Diabetes screening programs and hospital eye clinics in China	DeepDR Plus predicts time to progression up to 5 yrs using fundus alone; enables personalized screening intervals with minimal risk	Requires high-quality fundus images; potential bias from training predominantly on Chinese cohorts; integration into diverse global health systems needs evaluation
Emily S., 2023	https://www.jacc.org/doi/10.1016/j.jacc.2023.09.800	United States	Cardiology / Echocardiography	Automated echocardiogram interpretation (view classification, chamber quantification, LVEF, LA dimension, LV wall thickness) and prediction of cardiovascular outcomes	Training on 64,028 echocardiograms from 27,135 individuals; validated in a separate primary care cohort and an external healthcare system dataset	3D convolutional neural network (3D-CNN) with multi-instance attention (“DROID” workflow)	Human expert (EchoLab reference measurements)	View classification AUROC >0.97; Quantification vs EchoLab R²=0.53–0.91; Prognostic HRs per 1-SD ↓ model-derived LVEF (Heart failure HR 1.43 etc.)	Retrospective training; internal validation; external validation; Cox proportional hazards for outcome associations	U.S. healthcare systems (MGH, Broad Institute-affiliated cohorts, external validation sites)	DL model achieved near-expert performance for echo interpretation and predicted major cardiovascular outcomes	Generalizability across imaging hardware/institutions; integration into routine clinical workflows not yet established
Xiangyun Bai, 2024	https://www.nature.com/articles/s41598-024-75531-w	China	Cardiology / ECG	Automated classification of cardiac arrhythmias using 12-lead ECG signals	Evaluated on MIT-BIH Arrhythmia Database; generalization tested on PTB dataset	CBGM model — hybrid (CNN + BiGRU + multi-head attention)	Prior DL approaches (1D-CNN, CNN+BiLSTM, CNN+SVM)	On MIT-BIH: Accuracy 99.41%, Precision 99.15%, Specificity 99.68%, F1 99.21%; On PTB generalization: AUC 0.9875	Retrospective performance evaluation on publicly available ECG datasets (MIT-BIH; PTB)	Research/benchmark evaluation (no clinical deployment)	Hybrid model achieved extremely high accuracy and strong generalization on independent dataset	Generalisability across diverse clinical ECG sources; need for real-world deployment testing and interpretability
Ahmed E Mansour Atwa et al., 2025	https://pmc.ncbi.nlm.nih.gov/articles/PMC12346745/	Egypt	Cardiology / ECG	Automated arrhythmia classification from 12-lead ECG signals with interpretable deep learning models	PTB-XL dataset (large, heterogeneous publicly available ECG dataset)	Custom CNN incorporating demographic features (age, gender); interpretable model components	Baseline VGG16 model; variations with/without demographics	Binary (normal vs superclass): ~95% accuracy (↑ with demographics); Subclass classification: ~97–98% accuracy; Multiclass 71–79% (with augmentation)	Training/validation on PTB-XL; test on held-out sets	Retrospective evaluation using public ECG datasets (no clinical deployment)	Custom CNN with demographics improved performance and interpretability; augmentation stabilized multiclass results	Need for real-world validation beyond datasets; ensure model interpretability & generalizability
